# Supplementary material for: Potato (Solanum tuberosum) as a New Host for Pentastiridius leporinus (Hemiptera: Cixiidae) and Candidatus Arsenophonus Phytopathogenicus
Source: Insects. 2023 Mar 13;14(3):281. doi: 10.3390/insects14030281 (PMC10058626; doi:10.3390/insects14030281)
Supplement: Supplementary file 1 [file insects-14-00281-s001.zip › insects-2248745-supplementary.pdf]

# Supplementary File

**Table S1.** Morphometric measurements and developmental stages of field-collected *Pentastiridius leporinus* nymphs on potato plants in September 2022.

| Stage         | Length [ $\mu\text{m}$ ] |                | Head width [ $\mu\text{m}$ ] |               | n  |
|---------------|--------------------------|----------------|------------------------------|---------------|----|
|               | Range                    | Mean $\pm$ SD  | Range                        | Mean $\pm$ SD |    |
| Third instar  | 1709–2502                | 2164 $\pm$ 247 | 457–591                      | 546 $\pm$ 51  | 9  |
| Fourth instar | 1923–3895                | 2904 $\pm$ 386 | 601–818                      | 682 $\pm$ 47  | 57 |
| Fifth instar  | 3195–4926                | 3867 $\pm$ 444 | 847–1080                     | 944 $\pm$ 69  | 34 |

Most were fourth-instar nymphs, as reported in previous studies [6]. To confirm the ability of *P. leporinus* to feed, oviposit and hatch on potato, adults were maintained on potato plants for oviposition and freshly hatched nymphs were measured. The five individual first-stage nymphs, measured shortly after hatching, had a head width of 156–264  $\mu\text{m}$ , the mean width was 209.8  $\mu\text{m}$ , and the length ranged from 491 to 921  $\mu\text{m}$  (mean = 658  $\mu\text{m}$ ).

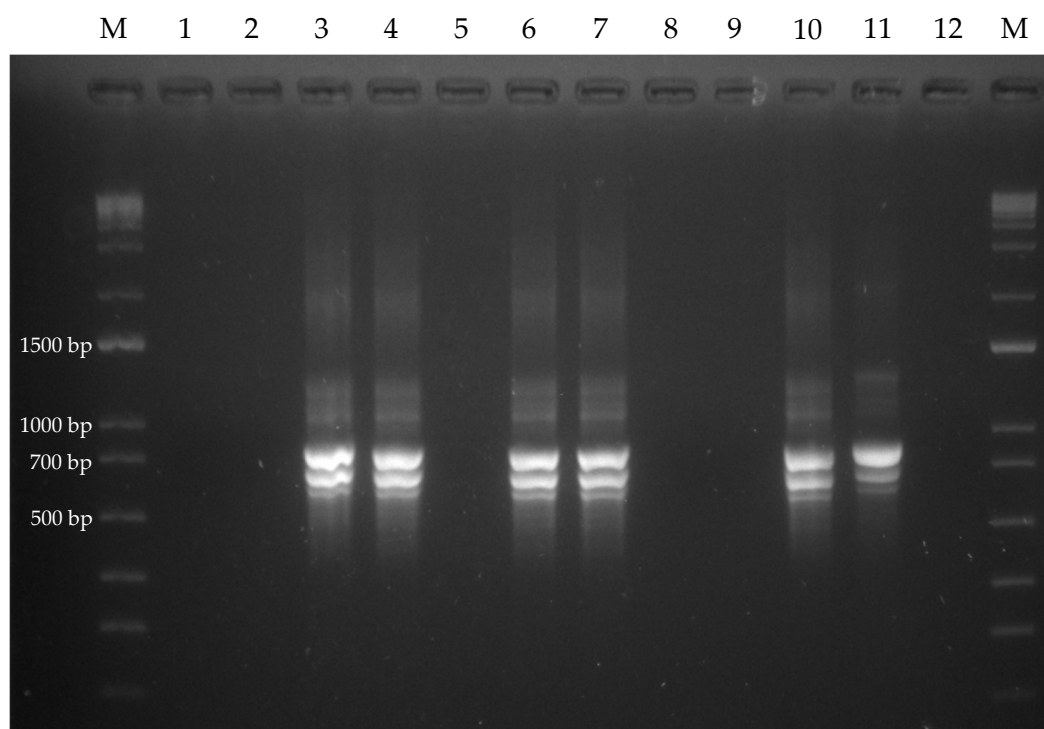

**Figure S1.** Gel electrophoresis of the nested PCR products obtained with primer Pairs Fra5/L1r and Alb1/Oliv1. 1 & 2: Negative tested (qRT-PCR) *Pentastiridius leporinus* from field, 3 & 4: Positive tested (qRT-PCR) *P. leporinus* from field, 5: Negative tested (qRT-PCR) sugar beet from greenhouse, 6 & 7 Positive tested (qRT-PCR) sugar beet from field, 8 & 9: Negative tested (qRT-PCR) potato from field, 10 & 11: Positive tested (qRT-PCR) potato from field, 12: Non-template-control, M: GenRuler 1 kb Plus DNA-Ladder (Thermo Scientific).
